## CORRECTION

# *In vivo* analysis of formation and endocytosis of the Wnt/ $\beta$ -Catenin signaling complex in zebrafish embryos

Anja I. H. Hagemann, Jennifer Kurz, Silke Kauffeld, Qing Chen, Patrick M. Reeves, Sabrina Weber, Simone Schindler, Gary Davidson, Tomas Kirchhausen and Steffen Scholpp

There was an error published in *J. Cell Sci.* **127**, 3970-3982.

The first line of the Abstract should read as follows: After activation by Wnt/ $\beta$ -Catenin ligands, a multi-protein complex assembles at the plasma membrane as membrane-bound receptors and intracellular signal transducers are clustered into the so-called Lrp6-signalosome.

We apologise to the readers for any confusion that this error might have caused.
